# Supplementary material
Source: PubMed Central journal article supplement (PMC4921276)
Supplement: NIHMS744708-supplement-01.pdf [file NIHMS744708-supplement-01.pdf]

## **Video Legend**

Office-based olfactory mucosa biopsy of the left septum. A zero-degree endoscope is used to perform the endoscopic procedure. The subject was topically anesthetized prior to the video as described in the text. A sickle knife is used to create an incision beyond the anterior edge of the middle turbinate. The sickle knife is then used to elevate a superior flap to allow placement of one cup of the forceps submucosally. The forceps is closed tightly and removed to obtain the biopsy. A second biopsy is then performed anterior to the first site. A cotton wisp soaked in lidocaine/oxymetazoline is used to help with hemostasis.
